# Supplementary material for: Scandare: A Successful, Flexible, Prospective, and Longitudinal Biobank Framework
Source: Research Square preprint supplement (doi:10.21203/rs.3.rs-7354298/v1), 2025-08-18
Supplement: Supplementary file 1 [file 146967c3ca5c7a9791585c41.xlsx]

## Sheet: Supplementary Table 7
gene_name	gene_id	logFC	AveExpr	t	P.Value	adj.P.Val	B
PON3	ENSG00000105852	3.88061	2.63868	5.51391	3.90628e-07	0.00623091	5.6365
SRMS	ENSG00000125508	4.23399	1.56678	5.29852	9.48801e-07	0.00756716	4.66382
GJB1	ENSG00000169562	4.33416	0.625526	5.09455	2.16755e-06	0.0115249	3.91554
ABCC12	ENSG00000140798	3.61161	0.173469	4.89526	4.78887e-06	0.0190968	3.22144
