# Supplementary material for: Scandare: A Successful, Flexible, Prospective, and Longitudinal Biobank Framework
Source: Research Square preprint supplement (doi:10.21203/rs.3.rs-7354298/v1), 2025-08-18
Supplement: Supplementary file 2 [file 268e4227ad65a3aad45329a3.xlsx]

## Sheet: GSEA_output_table
pathway	pval	padj	log2err	ES	NES	size
HALLMARK_INTERFERON_ALPHA_RESPONSE	7.27732e-16	2.32874e-14	1.02767	0.576703	2.96637	97
HALLMARK_IL6_JAK_STAT3_SIGNALING	3.27842e-12	5.24548e-11	0.898671	0.556184	2.72771	79
HALLMARK_OXIDATIVE_PHOSPHORYLATION	2.59762e-10	2.7708e-09	0.814036	-0.510986	-1.87216	199
HALLMARK_ANGIOGENESIS	3.42024e-08	2.73619e-07	0.719513	0.673162	2.74103	32
HALLMARK_COAGULATION	1.2544e-07	8.02813e-07	0.690132	0.400774	2.12697	110
HALLMARK_FATTY_ACID_METABOLISM	2.58303e-06	1.37761e-05	0.627257	-0.478966	-1.71756	148
HALLMARK_PEROXISOME	1.30027e-05	5.94408e-05	0.593325	-0.509716	-1.77012	98
HALLMARK_TGF_BETA_SIGNALING	1.93431e-05	7.73726e-05	0.57561	0.444183	1.98067	54
HALLMARK_BILE_ACID_METABOLISM	2.53986e-05	9.03063e-05	0.57561	-0.500108	-1.73008	95
HALLMARK_ADIPOGENESIS	3.41956e-05	0.000109426	0.557332	-0.428785	-1.57099	199
HALLMARK_ESTROGEN_RESPONSE_EARLY	7.32728e-05	0.000213157	0.538434	-0.422854	-1.54926	199
HALLMARK_XENOBIOTIC_METABOLISM	9.85621e-05	0.000262832	0.538434	-0.430995	-1.5629	174
