# Supplementary material for: Scandare: A Successful, Flexible, Prospective, and Longitudinal Biobank Framework
Source: Research Square preprint supplement (doi:10.21203/rs.3.rs-7354298/v1), 2025-08-18
Supplement: Supplementary file 3 [file 2cbd906f05f9e7c21988d5b6.xlsx]

## Sheet: SCAN-MacWP2_RNAseq_diff_analysi
	gene_name	logFC	AveExpr	t	P.Value	adj.P.Val	B	DE
ENSG00000119508	NR4A3	-3.93287	3.13303	-8.98381	2.38286e-06	0.0346111	2.69188	Down
