# Supplementary material for: Scandare: A Successful, Flexible, Prospective, and Longitudinal Biobank Framework
Source: Research Square preprint supplement (doi:10.21203/rs.3.rs-7354298/v1), 2025-08-18
Supplement: Supplementary file 4 [file 2d1f810fb7513716673b5625.xlsx]

## Sheet: Feuil1
	Supplementary Table 12. Position of the SCANDARE biobanking study among public datasets, biobanking studies and initiatives
	Name of the study		Type of cohort		SCANDARE study STRENGHTS	SCANDARE study LIMITS	Publications
Pan-cancer studies available on cBioportal	MSK-Chord		Pan-cancer		· Longitudinal samples collection	· Limited patients and samples size	Jee and al., 2024
					· European biobanking study	· Limited radiology reports
					· Various types of samples and preservation methods
					· Various types of data generated
					· Biobanking clinical trial approved by local authorities with a broad scientific question to support various translational research projects.
	MSK-IMPACT		Pan-cancer		· Longitudinal samples collection	· Limited patients and samples size	Zehir and al., 2017
					· European biobanking study	· Not a prospective sequencing programm
					· Various types of samples and preservation methods	· Limited tumor types
					· Various types of data generated	· Focus on early-stage patients
					· Biobanking clinical trial approved by local authorities with a broad scientific question to support various translational research projects.
	TMB and immuno cohort		Pan-cancer		· Longitudinal samples collection	· Limited patients and samples size	Samstein and al., 2019
					· European biobanking study	· Not a prospective sequencing programm
					· Various types of samples and preservation methods	· Limited patients treated with Immune Checkpoint inhibitors (ICI)
					· Various types of data generated	· Limited tumor types
					· Biobanking clinical trial approved by local authorities with a broad scientific question to support various translational research projects.
	MSK-Fusion		Pan-cancer		· Longitudinal samples collection	· Limited to adult patients	Rosen and al., 2020
					· European biobanking study	· Limited tumor types
					· Various types of samples and preservation methods	· Not a prospective sequencing programm
					· Various types of data generated
					· Biobanking clinical trial approved by local authorities with a broad scientific question to support various translational research projects.
	MI-ONCOSEQ		Pan-cancer		· Longitudinal samples collection	· Metastatic patients not already included	Robinson and al., 2017
					· European biobanking study	· Not a prospective sequencing programm
					· Various types of samples and preservation methods	· Not a prospective sequencing programm
					· Not limited to biopsies, allowing for broader utilization of samples
					· Various types of clinical data collected
					· Various types of data generated
					· Biobanking clinical trial approved by local authorities with a broad scientific question to support various translational research projects.
	MSS Mixed Solid Tumors		Pan-cancer		· Longitudinal samples collection	· Limited patients treated with Immune Checkpoint inhibitors (ICI)	Miao and al., 2018
					· European biobanking study	· Limited radiology reports
					· Various types of samples and preservation methods
					· Various types of clinical data collected
					· Various types of data generated
					· Biobanking clinical trial approved by local authorities with a broad scientific question to support various translational research projects.
	SUMMIT		Pan-cancer		· Longitudinal samples collection	· Limited tumor types, including orphan tumours	Hyman and al., 2018
					· European biobanking study	· Limited investigative centers
					· Various types of samples and preservation methods	· Limited investigative centers
					· Various types of data generated
					· Biobanking clinical trial approved by local authorities with a broad scientific question to support various translational research projects.
	Cancer therapy and clonal hematopoiesis		Pan-cancer		· Various types of samples and preservation methods	· Limited patients and samples size	Bolton and al., 2020
					· Various types of data generated	· Limited tumor types
					· European biobanking study
					· Biobanking clinical trial approved by local authorities with a broad scientific question to support various translational research projects.
	ORIGIMED-004		Pan-cancer		· Longitudinal samples collection	· Limited tumor types, including orphan tumours	Wu and al., 2022
					· Various types of samples and preservation methods	· Limited investigative centers
					· Various types of data generated
					· European biobanking study
					· Biobanking clinical trial approved by local authorities with a broad scientific question to support various translational research projects.
	ICGC/TCGA		Pan-cancer		· Longitudinal samples collection	· Limited patients and samples size	The ICGC/TCGA Pan-Cancer Analysis of Whole Genomes Consortium, 2020
					· Biobanking clinical trial approved by local authorities with a broad scientific question to support various translational research projects.	· Limited tumor types
					· European biobanking study	· Limited samples and data types
	MSK MetTropism		Pan-cancer		· Longitudinal samples collection	· Limited patients and samples size	Nguyen and al., 2022
					· European biobanking study	· Limited tumor types
					· Biobanking clinical trial approved by local authorities with a broad scientific question to support various translational research projects.
					· Various types of samples and preservation methods
					· Various types of data generated
Prospective biobanking studies or national initiatives	All of us research program		All diseases including pan-cancer		· Longitudinal samples collection	· Limited patients and samples size	Denny et al., 2019
					· Focus on cancer population	· Limited samples and data types
					· European biobanking study
					· Various types of data generated
	Cancer moonshot biobank		Pan-cancer		· European biobanking study	· Limited patients and samples size	Annapragada et. al, 2023
					· Various types of data generated	· Limited samples and data types
						· Limited tumor types
	Lung cancer biobank Heidelberg		Lung cancer		· Various tumor types	· Non small cell lung carcinoma (NSCLC) patients not included yet	Wessels et. al, 2020
					· Various types of collaborations (academic, industrial, national and international)
					· Various types of data generated
	London barts cancer institute		Breast cancer		· Various tumor types	· Limited to TNBC patients	Abdollahyan et. al, 2023
					· Various types of collaborations (academic, industrial, national and international)	· Limited patients and samples size
					· Various types of data generated
	(BIO)-project		Breast and ovarian cancers		· Various tumor types	· Limited multi-centers	De Gregorio et. al, 2020
					· Various types of data generated	· Limited patients and samples size
	RAIDS		Cervical cancer		· Various tumor types	· Limited multi-centers (including other countries)	Ngo et. al, 2015
					· Various types of data generated	· Limited patients and samples size
					· Various types of collaborations (academic, industrial, national and international)
	TRACERx		Lung, breast and kidney cancers		· Various types of data generated	· Limited multi-centers	Abbosh et al., 2017
					· Various types of samples and preservation methods	· Limited patients and samples size
					· Biobanking clinical trial approved by local authorities with a broad scientific question to support various translational research projects.
	WCB biobank		Pan-cancer		· Biobanking clinical trial approved by local authorities with a broad scientific question to support various translational research projects.	· Limited multi-centers (including other countries)	Parry-Jones et. al, 2014
					· Various types of collaborations (academic, industrial, national and international)	· Limited patients and samples size
						· Limited tumor types
	UK biobank		Pan-cancer		· Various types of data generated	· Limited patients and samples size	Conroy et. al, 2023
					· Longitudinal samples collection including recurrence and its follow-up
					· Various types of collaborations (academic, industrial, national and international)	· Limited samples type
					· Biobanking clinical trial approved by local authorities with a broad scientific question to support various translational research projects.	· Limited tumor types
	IARC biobank		Pan-cancer		· Longitudinal samples collection including recurrence and its follow-up	· Limited patients and samples size	Mendy et. al, 2019
					· Collection of tumor tissues and various preservation methods	· Limited multi-centers (including other countries)
						· Limited tumor types
	Uppsala biobank		Pan-cancer		· Biobanking clinical trial approved by local authorities with a broad scientific question to support various translational research projects.	· Limited patients and samples size	Engelmark et. al, 2014
					· Various types of data generated	· Limited tumor types
