# Supplementary material for: Scandare: A Successful, Flexible, Prospective, and Longitudinal Biobank Framework
Source: Research Square preprint supplement (doi:10.21203/rs.3.rs-7354298/v1), 2025-08-18
Supplement: Supplementary file 5 [file 37b54dc5c1600bb5979fe945.xlsx]

## Sheet: Feuil1
Supplementary Table 12. Description of data generated from several SCANDARE samples to date
Cohort	Sub-cohort	Number of patients	Type of samples used	Number of samples used	Type of data processed
Ovarian	NAC & UF	65	Frozen tissue	93 samples: 55 at baseline, 31 at post-NAC, 7 at recurrence and 62 gDNA	WES
Ovarian	NAC & UF	66	Frozen tissue	97 samples: 58 at baseline, 30 at post-NAC, 9 at recurrence	mRNAseq
Ovarian	NAC & UF	56	Fresh tissue	87 samples: 49 at baseline, 31 at post-NAC, 7 at recurrence	single-cell RNAseq
Ovarian	NAC & UF	15	Frozen tissue	22 samples: 11 at baseline, 9 at post-NAC, 2 at recurrence	Proteomics
Ovarian	NAC & UF	44	FFPE tissue	66 samples: 38 at baseline, 22 at post-NAC, 3 at recurrence	mIHC
Ovarian	NAC & UF	64	Plasma/ctDNA	64 samples at baseline	Methylation of LINE-1 retrotransposons
Ovarian	NAC & UF	207	PBMC and plasma	492 samples: 181 at baseline, 64 during NAC, 73 at post-NAC, 46 within 14 weeks post-surgery, 51 at 6 months post-surgery, 25 at recurrence, 30 during chemotherapy following recurrence, 22 at progression	ELISA for CMV status and FACS for immunological data
TNBC	NAC & UF	139	Frozen tissue	247 fragment from 139 samples (1 at 2 fragments per sample) at baseline and 138 gDNA	WES
TNBC	NAC & UF	139	Frozen tissue	247 fragments from 139 samples (1 at 2 fragments per sample) at baseline	shWGS
TNBC	NAC	91	Frozen tissue	124 samples: 84 at baseline and 40 at post-NAC	Total RNAseq
TNBC	NAC & UF	107	FFPE tissue	107 samples at baseline	WGS
TNBC	NAC & UF	107	Plasma/ctDNA	338 samples: 106 at baseline, 82 during NAC, 71 at post-NAC, 21 within 14 weeks post-surgery, 33 at 6 months post-surgery, 11 at recurrence, 8 during chemotherapy following recurrence and 6 at progression	DNAseq (NeXT Personal platform)
TNBC	NAC & UF	256	Plasma/ctDNA	256 samples at baseline	Methylation of LINE-1 retrotransposons
TNBC	NAC	42	Plasma	41 samples at baseline	Total RNAseq
TNBC	NAC & UF	271	PBMC and plasma	804 samples: 268 at baseline, 165 during NAC, 142 at post-NAC, 84 within 14 weeks post-surgery, 83 at 6 months post-surgery, 22 at recurrence, 20 during chemotherapy following recurrence, 20 at progression	ELISA for CMV status and FACS for immunological data
HNSCC	UF	83	FFPE tissue	265 fragments from 83 samples (1-5 fragments per sample) at baseline	Targeted panel (571 genes; DRAGON)
HNSCC	UF	90	FFPE tissue	280 fragments from 90 samples (1-5 fragments per sample) at baseline	3'RNAseq
HNSCC	UF	41	Plasma/ctDNA	115 samples: 41 at baseline, 34 within 14 weeks post-surgery, 18 at 6 months post-surgery and 22 at recurrence	Amplicon- based targeted sequencing test (OncoFOLLOW™)
HNSCC	UF	169	PBMC and plasma	373 samples: 161 at baseline, 105 within 14 weeks post-surgery, 35 at 6 months post-surgery, 38 at recurrence, 15 during chemotherapy following recurrence, 17 at progression	ELISA for CMV status and FACS for immunological data
