# Supplementary material for: Scandare: A Successful, Flexible, Prospective, and Longitudinal Biobank Framework
Source: Research Square preprint supplement (doi:10.21203/rs.3.rs-7354298/v1), 2025-08-18
Supplement: Supplementary file 6 [file 5e57ca3320dcbf6ca4c939d5.xlsx]

## Sheet: SCAN-MacWP2_RNAseq_diff_analysi
pathway	pval	padj	log2err	ES	NES	size
HALLMARK_TNFA_SIGNALING_VIA_NFKB	1e-50	5e-49	NA	-0.754206	-3.71176	197
HALLMARK_E2F_TARGETS	1.00273e-45	2.50683e-44	1.76244	0.697176	3.45614	199
HALLMARK_G2M_CHECKPOINT	3.13526e-39	5.22543e-38	1.62807	0.662157	3.26694	197
HALLMARK_MYC_TARGETS_V1	2.03442e-20	2.54302e-19	1.16907	0.541664	2.69249	200
HALLMARK_HYPOXIA	1.41193e-18	1.41193e-17	1.11466	-0.541413	-2.62982	191
HALLMARK_P53_PATHWAY	3.91197e-14	3.25998e-13	0.965328	-0.491628	-2.40601	194
HALLMARK_EPITHELIAL_MESENCHYMAL_TRANSITION	1.26005e-12	9.00037e-12	0.91012	-0.476216	-2.34018	199
HALLMARK_UV_RESPONSE_DN	3.38475e-10	2.11547e-09	0.814036	-0.487652	-2.27228	144
HALLMARK_INFLAMMATORY_RESPONSE	5.35479e-10	2.6774e-09	0.801216	-0.446709	-2.16935	190
HALLMARK_IL2_STAT5_SIGNALING	5.3037e-10	2.6774e-09	0.801216	-0.447193	-2.17614	192
HALLMARK_OXIDATIVE_PHOSPHORYLATION	7.20899e-10	3.27681e-09	0.801216	0.42761	2.11633	198
HALLMARK_MYOGENESIS	9.65666e-10	4.02361e-09	0.788187	-0.443942	-2.14238	181
HALLMARK_TGF_BETA_SIGNALING	6.09483e-09	2.34417e-08	0.761461	-0.632295	-2.51374	54
HALLMARK_APOPTOSIS	8.64555e-09	3.0877e-08	0.74774	-0.451973	-2.13932	158
HALLMARK_MITOTIC_SPINDLE	9.52024e-07	3.17341e-06	0.659444	0.38274	1.88887	196
HALLMARK_COMPLEMENT	3.93946e-06	1.23108e-05	0.610527	-0.377008	-1.82598	187
HALLMARK_ESTROGEN_RESPONSE_EARLY	1.08609e-05	3.19438e-05	0.593325	-0.367115	-1.80225	196
HALLMARK_IL6_JAK_STAT3_SIGNALING	1.59753e-05	4.43759e-05	0.57561	-0.464988	-1.96427	80
HALLMARK_KRAS_SIGNALING_UP	2.26931e-05	5.97188e-05	0.57561	-0.368474	-1.79049	189
HALLMARK_XENOBIOTIC_METABOLISM	2.41818e-05	6.04546e-05	0.57561	-0.371306	-1.79098	175
HALLMARK_SPERMATOGENESIS	7.93233e-05	0.000188865	0.538434	0.411248	1.83231	97
