# Supplementary material for: Scandare: A Successful, Flexible, Prospective, and Longitudinal Biobank Framework
Source: Research Square preprint supplement (doi:10.21203/rs.3.rs-7354298/v1), 2025-08-18
Supplement: Supplementary file 7 [file 6c5122e50f362dff88ff3d40.xlsx]

## Sheet: Feuil1
Supplementary Table 10. Overview of ongoing SCANDARE translational projects
Project objective	Cohort	Sub-cohort	Number of patients	Type of samples used	Number of samples used	Models generation	Type of data processed	Publication
Germline and somatic BRCA1 methylation status	TNBC	NAC and UF	136	Frozen tissue and gDNA	136 samples at baseline	NA	WES and shWGS	Under preparation
Impact of CMV status on clinical outcome	TNBC	NAC and UF	240	PBMC and Plasma	240 samples at baseline	NA	ELISA for CMV status and FACS for immunological data	Under preparation
New features of structural instability	TNBC	NAC and UF	107	FFPE tissue	107 samples at baseline	NA	WGS	Under preparation
Comprehensive evaluation of pre-operative and post-operative cfDNA kinetics, tumor specific clonality, and prognostic signatures	TNBC	NAC and UF	86	FFPE tissue	86 samples at baseline	NA	WGS	Under preparation
	TNBC	NAC and UF	86	Plasma/ctDNA	286 samples: 85 at baseline, 82 during NAC, 71 at post-NAC, 26 at 6 months post-surgery, 10 at recurrence, 7 during chemotherapy following recurrence and 5 at progression	NA	DNAseq (NeXT Personal platform)
Clinical validation of an algorithm for assessing early changes in tumor burden measured from a liquid biopsy treated with monotherapy immunotherapy and other therapies	TNBC	NAC and UF	114	Plasma/ctDNA	208 samples: 27 at baseline, 23 within 14 weeks post-surgery, 21 during NAC, 78 at post-NAC surgery, 36 at 6 months post-surgery, 7 at recurrence, 8 during chemoterapy following recurrence and 8 at progression	NA	DNAseq (xM - MRD)	Under preparation
Characterization of intra-tumorale heterogeneity at diagnosis in TNBC patients	TNBC	NAC and UF	139	Frozen tissue and gDNA	247 fragment from 139 samples (1 at 2 fragments per sample) at baseline and 138 gDNA	NA	WES	Under preparation
	TNBC	NAC and UF	139	Frozen tissue	247 fragments from 139 samples (1 at 2 fragments per sample) at baseline	NA	shWGS
Characterization of longitudinal intra-tumorale heterogeneity in TNBC patients	TNBC	NAC and UF	15	Frozen tissue and gDNA	69 fragments from 35 samples: 30 fragments/15 samples at baseline, 27 fragments/14 samples at post-NAC, 12 fragments/6 samples at recurrence	NA	WES	Under preparation
	TNBC	NAC and UF	100	Frozen tissue	120 samples (1 fragment per sample): 100 samples at baseline, 14 samples at post-NAC and 6 samples at recurrence.	NA	mRNAseq
	TNBC	NAC and UF	106	FFPE tissue	106 samples at baseline (1 fragment per sample)	NA	IHC
Discovering functional lncRNAs landscape in neoadjuvant chemoresistant triple negative breast cancers	TNBC	NAC	78	Frozen tissue	78 samples at baseline	NA	Total RNAseq	Under review
	TNBC	NAC	41	Plasma	41 samples at baseline	NA	Total RNAseq	Under preparation
Invasion dynamics of long noncoding RNAs cargo by cancer-produced Extracellular Vesicles into macrophages	TNBC	NAC	113	Frozen tissue	113 samples at baseline	NA	Total RNAseq	Under preparation
	TNBC	NAC	113	Plasma	113 samples at baseline	NA	Total RNAseq
Biological Function and Clinical Value of New Components of Extracellular Vesicles in the Tumor-Immune System Dialogue	TNBC	NAC	20	Plasma	56 samples: 20 at baseline, 20 at post-NAC, 6 at 6 months post-surgery and 10 at recurrence	NA	Flow cytometry	Under preparation
Role of CAFs in the resistance of chemotherapy in TNBC patients	TNBC	NAC	88	Frozen tissue	114 samples: 78 at baseline and 36 at post-NAC	NA	Total RNAseq	Under review
Molecular mechanisms associated with chemo resistance in TNBC	TNBC	NAC	48	Frozen tissue and gDNA	96 samples: 48 at baseline, 48 at post-NAC and 48 gDNA	NA	WES	Under preparation
	TNBC	NAC	48	Frozen tissue	96 samples: 48 at baseline, 48 at post-NAC	NA	Total RNAseq
Development of single cell and epigenomics analyses on frozen tissues from TNBC patients	TNBC	NAC	1	Fresh tissue	1 samples at baseline	NA	snRNAseq	Under preparation
			3	Fresh tissue	3 samples at baseline	NA	FACS
Identification of Sensitivity Biomarkers to Novel Targeted Therapies in Triple-Negative Breast Cancer Using a Large Panel of Xenografted Tumors	TNBC	NAC	6	Fresh tissue	5 samples at post-NAC and 1 sample at recurrence	6 Patient Derived Xenograft (PDX)	Targeted panel (571 genes; DRAGON)	Under preparation
Refine cancer patient indications for Kindlin-1 inhibitors and assess its combination with EGFR/RAS inhibitors to overcome resistance and improve clinical outcomes	HNSCC	UF	2	Fresh tissue	2 samples at baseline	Tumor-on-Chips	NA	Under preparation
Study of longitudinal heterogeneity using circulating tumor DNA in early stage head and neck patients	HNSCC	UF	41	FFPE tissue	41 samples at baseline	NA	Targeted panel (571 genes; DRAGON)	Marret et al., 2025
	HNSCC	UF	41	Plasma/ctDNA	115 samples: 41 at baseline, 34 within 14 weeks post-surgery, 18 at 6 months post-surgery and 22 at recurrence	NA	Amplicon- based targeted sequencing test (OncoFOLLOW™)
Assessing spatial heterogeneity by transcriptomic and genomic analyses of well and poorly differentiated regions from early stage head and neck patients	HNSCC	UF	78	FFPE tissue	199 fragments from 78 samples (1-5 fragments per sample) at baseline	NA	Targeted panel (571 genes; DRAGON)	Under preparation
	HNSCC	UF	78	FFPE tissue	196 fragments from 78 samples (1-4 fragments per sample) at baseline	NA	3'RNAseq
Complement system as a pathogenic driver and therapeutic target in Head and Neck Cancer	HNSCC	UF	12	FFPE tissue	12 FFPE samples at baseline	NA	Hyperplex imaging (COMET/Lunaphore©)	Under preparation
	HNSCC	UF	12	FFPE tissue	12 FFPE samples at baseline	NA	Spatial transcriptomics (Visium HD)
	HNSCC	UF	144	FFPE tissue	144 FFPE samples at baseline	NA	Multiplex IHC
	HNSCC	UF	144	Plasma	175 samples: 144 at baseline and 31 at recurrence	NA	ELISA
	HNSCC	UF	144	Plasma	175 samples: 144 at baseline and 31 at recurrence	NA	Luminex assay
	HNSCC	UF	14	Fresh tissue	14 samples at baseline	Patient-derived tumor fragments	Video imaging, immunostaining, FACS and single-cell RNAseq
Detection and quantification of tumor and immune-related biomarkers	HNSCC	UF	33	Fresh tissue	33 samples at baseline	NA	FACS	Under preparation
Internal validation of strategies evaluations for predictive models in high-dimensional situations	HNSCC	UF	78	FFPE tissue	78 samples at baseline	NA	3'RNAseq	Under review
Identification of new genes and pathways that modulate the behavior of HNSCC tumors	HNSCC	UF	81	FFPE tissue	228 fragments from 81 samples (1-5 fragments per sample) at baseline	NA	Targeted panel (571 genes; DRAGON)	Under preparation
Supporting Personalized Treatment Decisions in Head and Neck Cancer through Big Data	HNSCC	UF	72	FFPE tissue	211 fragments from 72 samples at baseline	NA	Targeted panel (571 genes; DRAGON)	Fossen et al., 2024
Conduct scRNA-seq before and after neoadjuvant treatment in HGSOC patients to identify non-genetic druggable targets in chemo-resistant ovarian cancer	Ovarian	NAC and UF	16	Fresh tissue	19 samples: 13 at baseline and 6 at post-NAC	NA	single-cell RNAseq	Under preparation
	Ovarian	NAC and UF	21	Frozen tissue	45 samples: 21 at baseline, 19 at post-NAC and 5 at recurrence	NA	single-cell RNAseq
Identification of therapeutic targets, biomarkers, and pathways to improve ovarian cancer management.	Ovarian	NAC and UF	65	Frozen tissue and gDNA	92 samples: 54 at baseline, 35 at post-NAC, 7 at recurrence and 61 gDNA	NA	WES	Under preparation
	Ovarian	NAC and UF	66	Frozen tissue	97 samples: 58 at baseline, 30 at post-NAC and 9 at recurrence	NA	mRNAseq
	Ovarian	NAC and UF	15	Frozen tissue	22 samples: 11 at baseline, 9 at post-NAC and 2 at recurrence	NA	Proteomics
	Ovarian	NAC and UF	8	Frozen tissue	10 samples: 8 at baseline and 2 at post-NAC	NA	Ribosequencing
	Ovarian	NAC and UF	8	Serum	20 samples: 8 at baseline, 6 at post-NAC and 6 at recurrence	NA	Microarray
	Ovarian	NAC and UF	66	FFPE tissue	82 samples: 50 at baseline, 27 at post-NAC and 5 at recurrence	NA	Multiplex IHC
	Ovarian	NAC and UF	17	Fresh tissue	19 samples: 12 at baseline, 5 at post-NAC and 2 at recurrence	NA	single-cell RNAseq
Biomarkers analyses and identification of new therapeutic targets in ovarian cancer patients	Ovarian	NAC and UF	30	Frozen tissue	30 samples at baseline	NA	mRNAseq	Under preparation
Identification of biomarkers of response to platinum in ovarian cancer patients	Ovarian	NAC and UF	45	Frozen tissue	45 samples at baseline	1 Patient Derived Xenograft (PDX)	mRNAseq	Under preparation
Role of CAFs in the resistance of chemotherapy in ovarian patients	Ovarian	NAC and UF	49	Frozen tissue	78 samples: 46 at baseline, 25 at post-NAC and 7 at recurrence	NA	mRNAseq	Licaj et al., 2024
Perform a systematic characterization of TME composition and cell communication network before and after neoadjuvant treatment	Ovarian	NAC and UF	31	Fresh tissue	34 samples: 22 at baseline, 10 at post-NAC and 2 at recurrence	NA	single-cell RNAseq	Under preparation
Analysis of the heterogeneity of tumor-associated macrophages in TNBC	Ovarian	NAC and UF	9	Fresh tissue	10 samples: 8 at baseline and 2 at post-NAC	NA	single-cell RNAseq	Under preparation
Noninvasive Multicancer Detection Using DNA Hypomethylation of LINE-1 Retrotransposons	Ovarian	NAC and UF	59	Plasma/ctDNA	59 samples at baseline	NA	Methylation of LINE-1 retrotransposons	Michel et al., 2024
	TNBC	NAC and UF	56	Plasma/ctDNA	56 samples at baseline	NA	Methylation of LINE-1 retrotransposons
Validation of overexpression of KIF as therapeutic targets of interest based on transcriptomics data	Ovarian	NAC and UF	40	Frozen tissue	40 samples at baseline	NA	mRNAseq	Under preparation
	TNBC	NAC and UF	84	Frozen tissue	84 samples at baseline	NA	Total RNaseq
	HNSCC	UF	78	FFPE tissue	78 samples at baseline	NA	3'RNAseq
Real time characterization of systemic immune response	Ovarian	NAC and UF	207	PBMC and Plasma	492 samples: 181 at baseline, 64 during NAC, 73 at post-NAC, 46 within 14 weeks post-surgery, 51 at 6 months post-surgery, 25 at recurrence, 30 during chemotherapy following recurrence, 22 at progression	NA	ELISA for CMV status and FACS for immunological data	Under preparation
	TNBC	NAC and UF	271	PBMC and Plasma	804 samples: 268 at baseline, 165 during NAC, 142 at post-NAC, 84 within 14 weeks post-surgery, 83 at 6 months post-surgery, 22 at recurrence, 20 during chemotherapy following recurrence, 20 at progression	NA
	HNSCC	UF	169	PBMC and Plasma	373 samples: 161 at baseline, 105 within 14 weeks post-surgery, 35 at 6 months post-surgery, 38 at recurrence, 15 during chemotherapy following recurrence, 17 at progression	NA
Impact of mutational signatures in the clinical evolution of early and advanced cancers	Ovarian	NAC and UF	40	Frozen tissue	40 samples at baseline	NA	WES	Under preparation
	TNBC	NAC and UF	137	Frozen tissue	137 samples at baseline	NA	WES
	HNSCC	UF	72	FFPE tissue	72 samples at baseline	NA	Targeted panel (571 genes; DRAGON)
