# Supplementary material for: Scandare: A Successful, Flexible, Prospective, and Longitudinal Biobank Framework
Source: Research Square preprint supplement (doi:10.21203/rs.3.rs-7354298/v1), 2025-08-18
Supplement: Supplementary file 9 [file dbf2456612e706e3727138a3.xlsx]

## Sheet: SCAN-MacWP2_RNAseq_diff_analysi
	gene_name	logFC	AveExpr	t	P.Value	adj.P.Val	B	DE
ENSG00000179593	ALOX15B	-3.38674	2.788	-7.82258	1.79193e-06	0.0191614	5.01774	Down
ENSG00000142871	CCN1	-3.28033	8.24952	-7.13197	5.11517e-06	0.0191614	4.17957	Down
ENSG00000118523	CCN2	-3.07117	8.60576	-7.15848	4.90767e-06	0.0191614	4.11006	Down
ENSG00000099860	GADD45B	-2.47596	6.91109	-6.5224	1.35997e-05	0.0276195	3.40748	Down
ENSG00000203760	CENPW	1.99893	5.20783	6.32658	1.88196e-05	0.0276195	3.14756	Up
ENSG00000169508	GPR183	-1.6383	4.31873	-6.28683	2.01155e-05	0.0276195	3.0678	Down
ENSG00000080986	NDC80	1.72423	2.87829	6.2017	2.32156e-05	0.0276195	2.89424	Up
ENSG00000090104	RGS1	-2.22498	6.10872	-6.16146	2.48515e-05	0.0276195	2.89242	Down
ENSG00000096060	FKBP5	-2.36099	5.0092	-6.15822	2.49886e-05	0.0276195	2.88635	Down
ENSG00000100526	CDKN3	1.71662	2.90903	6.22784	2.22136e-05	0.0276195	2.87503	Up
ENSG00000179094	PER1	-2.62463	5.99294	-6.13048	2.61934e-05	0.0276195	2.83773	Down
ENSG00000136108	CKAP2	1.30615	3.64997	6.13978	2.57827e-05	0.0276195	2.83511	Up
ENSG00000143127	ITGA10	-1.64463	2.21589	-6.0987	2.7649e-05	0.0276195	2.7113	Down
ENSG00000024526	DEPDC1	2.21716	1.56151	5.98053	3.38489e-05	0.0281773	2.45083	Up
ENSG00000106366	SERPINE1	-3.17282	6.9552	-5.87592	4.05543e-05	0.0303833	2.42537	Down
ENSG00000138778	CENPE	1.37716	1.21033	5.99152	3.32155e-05	0.0281773	2.3573	Up
ENSG00000130222	GADD45G	-1.80098	5.13227	-5.74899	5.06001e-05	0.0355301	2.20986	Down
ENSG00000123358	NR4A1	-4.15456	6.50759	-5.72842	5.24591e-05	0.0355301	2.18077	Down
ENSG00000144655	CSRNP1	-1.96504	6.01734	-5.6854	5.65809e-05	0.0355301	2.11767	Down
ENSG00000126787	DLGAP5	2.13731	2.4281	5.66807	5.83358e-05	0.0355301	2.03599	Up
ENSG00000170312	CDK1	2.14986	3.54427	5.60835	6.483e-05	0.0355301	1.97494	Up
ENSG00000144354	CDCA7	1.61288	2.90201	5.58319	6.77884e-05	0.0355301	1.94911	Up
ENSG00000165244	ZNF367	1.08006	2.16156	5.65844	5.93348e-05	0.0355301	1.92423	Up
ENSG00000277157	H4C4	1.99548	0.836336	5.60131	6.56439e-05	0.0355301	1.77503	Up
ENSG00000123342	MMP19	-2.79617	5.39426	-5.42839	8.93748e-05	0.0424533	1.68847	Down
ENSG00000107372	ZFAND5	-1.1884	7.03687	-5.38673	9.63302e-05	0.0424533	1.61822	Down
ENSG00000092470	WDR76	1.29795	2.29166	5.39533	9.485e-05	0.0424533	1.57318	Up
ENSG00000120129	DUSP1	-2.89057	8.99125	-5.3907	9.56446e-05	0.0424533	1.56129	Down
ENSG00000196188	CTSE	1.61097	0.59195	5.44698	8.64407e-05	0.0424533	1.52019	Up
ENSG00000139289	PHLDA1	-1.73737	4.78185	-5.32034	0.000108605	0.0439723	1.50232	Down
ENSG00000109805	NCAPG	1.95315	2.51337	5.31194	0.00011027	0.0439723	1.46831	Up
ENSG00000067082	KLF6	-1.62241	6.92923	-5.29641	0.000113418	0.0439723	1.4631	Down
ENSG00000137807	KIF23	1.83461	2.76299	5.2775	0.000117379	0.0439723	1.42151	Up
ENSG00000213366	GSTM2	-1.35384	3.52247	-5.269	0.000119206	0.0439723	1.41891	Down
ENSG00000176890	TYMS	1.76031	4.56616	5.25965	0.000121251	0.0439723	1.39446	Up
ENSG00000137801	THBS1	-2.18216	6.01391	-5.21889	0.000130598	0.0439723	1.33114	Down
ENSG00000125740	FOSB	-4.99785	6.16785	-5.21279	0.000132058	0.0439723	1.3125	Down
ENSG00000128016	ZFP36	-2.72873	9.09938	-5.23659	0.000126449	0.0439723	1.29365	Down
ENSG00000118263	KLF7	-1.0104	3.86152	-5.17337	0.000141924	0.0462301	1.24556	Down
ENSG00000117479	SLC19A2	-2.11845	4.2138	-5.15765	0.000146071	0.0465686	1.22879	Down
