# Supplementary material for: Scandare: A Successful, Flexible, Prospective, and Longitudinal Biobank Framework
Source: Research Square preprint supplement (doi:10.21203/rs.3.rs-7354298/v1), 2025-08-18
Supplement: Supplementary file 10 [file f67bb73a1da9ac28ad0b7730.xlsx]

## Sheet: SCAN-MacWP2_RNAseq_diff_analysi
	gene_name	logFC	AveExpr	t	P.Value	adj.P.Val	B	DE
ENSG00000099860	GADD45B	-2.35246	7.29586	-7.862	6.762e-08	0.000503308	8.15676	Down
ENSG00000144655	CSRNP1	-2.07133	6.30488	-7.66581	1.02912e-07	0.000503308	7.82701	Down
ENSG00000179094	PER1	-2.28427	6.16957	-7.57332	1.25667e-07	0.000503308	7.6544	Down
ENSG00000123358	NR4A1	-4.02144	6.81113	-7.55755	1.30037e-07	0.000503308	7.5801	Down
ENSG00000179593	ALOX15B	-2.69209	2.69943	-7.31321	2.21751e-07	0.000686631	6.93504	Down
ENSG00000142871	CCN1	-2.77313	8.71809	-7.21951	2.72691e-07	0.000703634	6.80423	Down
ENSG00000185022	MAFF	-2.20189	4.51331	-7.09148	3.62405e-07	0.000801536	6.64735	Down
ENSG00000118523	CCN2	-2.47155	9.03491	-6.96446	4.81563e-07	0.000931946	6.22321	Down
ENSG00000119508	NR4A3	-3.42245	2.84826	-6.85705	6.13434e-07	0.00105524	6.03063	Down
ENSG00000138166	DUSP5	-2.30278	5.59337	-6.65758	9.65316e-07	0.0014945	5.7522	Down
ENSG00000109321	AREG	-3.27368	3.3143	-6.57175	1.17507e-06	0.00165386	5.46348	Down
ENSG00000117479	SLC19A2	-2.07028	4.32028	-6.49297	1.4086e-06	0.00168957	5.37176	Down
ENSG00000162772	ATF3	-2.79544	5.79142	-6.45776	1.52784e-06	0.00168957	5.32672	Down
ENSG00000130522	JUND	-1.31535	9.66124	-6.4894	1.42024e-06	0.00168957	5.23831	Down
ENSG00000153234	NR4A2	-2.4992	4.54422	-6.41418	1.68987e-06	0.0016937	5.22218	Down
ENSG00000137801	THBS1	-2.02141	6.4898	-6.399	1.75036e-06	0.0016937	5.20157	Down
ENSG00000130222	GADD45G	-1.62407	5.28959	-6.33953	2.0094e-06	0.00172831	5.04994	Down
ENSG00000148841	ITPRIP	-1.50013	4.30621	-6.27082	2.35805e-06	0.00182537	4.92438	Down
ENSG00000087074	PPP1R15A	-1.45429	7.0602	-6.27195	2.35183e-06	0.00182537	4.91977	Down
ENSG00000111859	NEDD9	-1.48778	4.39982	-6.22801	2.60592e-06	0.00192119	4.8316	Down
ENSG00000106366	SERPINE1	-2.67844	7.29202	-6.10111	3.50904e-06	0.00227204	4.54533	Down
ENSG00000179388	EGR3	-3.28585	3.80305	-6.10799	3.45272e-06	0.00227204	4.54155	Down
ENSG00000067082	KLF6	-1.69351	7.13919	-6.09953	3.52209e-06	0.00227204	4.52718	Down
ENSG00000116285	ERRFI1	-2.04185	6.64515	-6.0539	3.92158e-06	0.00234976	4.44092	Down
ENSG00000139289	PHLDA1	-1.7333	4.99322	-6.05126	3.94612e-06	0.00234976	4.43958	Down
ENSG00000164949	GEM	-2.24916	4.50865	-5.98562	4.60756e-06	0.00253559	4.28651	Down
ENSG00000173334	TRIB1	-1.52607	5.68238	-5.9728	4.74952e-06	0.00253559	4.2658	Down
ENSG00000128016	ZFP36	-2.52242	9.43002	-6.02247	4.2234e-06	0.00242173	4.25963	Down
ENSG00000134107	BHLHE40	-1.51592	6.89608	-5.93779	5.15995e-06	0.00256506	4.18691	Down
ENSG00000096060	FKBP5	-2.18098	5.11995	-5.9008	5.63312e-06	0.00256506	4.10374	Down
ENSG00000143127	ITGA10	-1.36336	2.27787	-5.90563	5.5689e-06	0.00256506	4.06796	Down
ENSG00000171223	JUNB	-1.85515	9.68237	-5.90663	5.55579e-06	0.00256506	4.03355	Down
ENSG00000142178	SIK1	-2.33435	2.37611	-5.91707	5.4198e-06	0.00256506	4.0308	Down
ENSG00000169508	GPR183	-1.44141	4.43437	-5.84593	6.41788e-06	0.00276761	3.97407	Down
ENSG00000173846	PLK3	-1.53326	5.04397	-5.83823	6.53658e-06	0.00276761	3.96237	Down
ENSG00000136108	CKAP2	1.18788	3.6199	5.83327	6.61423e-06	0.00276761	3.94265	Up
ENSG00000148339	SLC25A25	-1.58068	4.66795	-5.80881	7.01094e-06	0.0028564	3.89712	Down
ENSG00000124762	CDKN1A	-1.652	6.50391	-5.73717	8.31855e-06	0.00326659	3.73459	Down
ENSG00000132326	PER2	-1.46407	4.12837	-5.73112	8.4397e-06	0.00326659	3.72018	Down
ENSG00000123342	MMP19	-2.49852	5.71626	-5.68059	9.52489e-06	0.00351105	3.60653	Down
ENSG00000109906	ZBTB16	-2.87863	2.87631	-5.68473	9.43088e-06	0.00351105	3.60597	Down
ENSG00000090104	RGS1	-1.76758	6.24718	-5.63212	1.06991e-05	0.00362875	3.49686	Down
ENSG00000024526	DEPDC1	1.79526	1.63435	5.66221	9.95384e-06	0.00358385	3.49322	Up
ENSG00000100526	CDKN3	1.37335	3.1474	5.62891	1.07817e-05	0.00362875	3.44671	Up
ENSG00000059804	SLC2A3	-1.65677	4.75654	-5.55071	1.30125e-05	0.00419706	3.31119	Down
ENSG00000118985	ELL2	-2.09503	4.11621	-5.52813	1.374e-05	0.00431873	3.26185	Down
ENSG00000107372	ZFAND5	-1.2887	7.10637	-5.52191	1.39476e-05	0.00431873	3.24842	Down
ENSG00000158050	DUSP2	-1.74552	4.86862	-5.4964	1.48327e-05	0.00450275	3.19058	Down
ENSG00000066279	ASPM	1.73887	1.87478	5.46957	1.58253e-05	0.00462278	3.05455	Up
ENSG00000203760	CENPW	1.65724	5.39153	5.42161	1.7771e-05	0.00500239	3.01831	Up
ENSG00000120129	DUSP1	-2.58791	9.17445	-5.42799	1.74986e-05	0.00500239	3.00099	Down
ENSG00000163659	TIPARP	-1.99274	5.03836	-5.33887	2.17159e-05	0.00589834	2.82878	Down
ENSG00000132510	KDM6B	-1.64868	5.37603	-5.29606	2.40943e-05	0.00622455	2.72987	Down
ENSG00000158859	ADAMTS4	-2.57774	2.85619	-5.28877	2.45251e-05	0.00622455	2.71131	Down
ENSG00000135709	KIAA0513	-1.22372	2.41335	-5.28924	2.44968e-05	0.00622455	2.66442	Down
ENSG00000213366	GSTM2	-1.01802	3.62228	-5.26233	2.61536e-05	0.00642715	2.65869	Down
ENSG00000175592	FOSL1	-2.75445	3.2564	-5.26409	2.60415e-05	0.00642715	2.64824	Down
ENSG00000138135	CH25H	-1.81025	2.8129	-5.23836	2.77238e-05	0.00650332	2.60413	Down
ENSG00000198576	ARC	-2.59377	2.18873	-5.22681	2.85145e-05	0.00651026	2.55875	Down
ENSG00000138778	CENPE	1.10823	1.22964	5.22566	2.85943e-05	0.00651026	2.51787	Up
ENSG00000151790	TDO2	1.40376	1.04475	5.19896	3.05158e-05	0.00674923	2.45976	Up
ENSG00000074410	CA12	1.82632	2.70489	5.16549	3.31111e-05	0.00711981	2.42997	Up
ENSG00000155090	KLF10	-1.28363	5.79631	-5.15944	3.36032e-05	0.00712663	2.41184	Down
ENSG00000221869	CEBPD	-1.55223	9.66806	-5.16598	3.30708e-05	0.00711981	2.39143	Down
ENSG00000143384	MCL1	-1.05656	8.79024	-5.12136	3.6876e-05	0.0075837	2.33548	Down
ENSG00000139734	DIAPH3	1.12069	1.65109	5.13438	3.57221e-05	0.00747364	2.31911	Up
ENSG00000187479	C11orf96	-2.80846	6.22606	-5.10741	3.8154e-05	0.00766513	2.30385	Down
ENSG00000184205	TSPYL2	-1.4506	6.10429	-5.10247	3.86178e-05	0.00766513	2.27733	Down
ENSG00000126787	DLGAP5	1.71631	2.50618	5.07761	4.10369e-05	0.00766758	2.232	Up
ENSG00000256235	SMIM3	-1.45696	5.46738	-5.07692	4.11064e-05	0.00766758	2.21889	Down
ENSG00000184557	SOCS3	-1.76688	7.75302	-5.05082	4.38155e-05	0.00806354	2.17789	Down
ENSG00000125740	FOSB	-4.16796	6.64968	-5.0466	4.42708e-05	0.00806354	2.16833	Down
ENSG00000165030	NFIL3	-1.59969	5.7787	-5.01775	4.751e-05	0.0085529	2.08135	Down
ENSG00000080986	NDC80	1.46778	3.08408	4.97596	5.26319e-05	0.00914366	2.00811	Up
ENSG00000117525	F3	-1.72984	5.93454	-4.9831	5.17184e-05	0.00909892	2.00204	Down
ENSG00000122877	EGR2	-2.08626	3.93241	-4.91211	6.15538e-05	0.0102471	1.8587	Down
ENSG00000161835	GRASP	-1.37293	5.14409	-4.90043	6.3344e-05	0.0104329	1.80638	Down
ENSG00000116741	RGS2	-2.05335	6.33987	-4.85966	7.00146e-05	0.0110609	1.72558	Down
ENSG00000177459	ERICH5	1.1853	2.25585	4.86236	6.95528e-05	0.0110609	1.7252	Up
ENSG00000118515	SGK1	-1.64292	5.69579	-4.85463	7.08862e-05	0.0110855	1.70109	Down
ENSG00000119986	AVPI1	-1.36258	5.11824	-4.83595	7.42156e-05	0.0114901	1.68572	Down
ENSG00000087085	ACHE	-1.12887	1.56296	-4.80649	7.97908e-05	0.0119934	1.6103	Down
ENSG00000171320	ESCO2	1.03349	0.669887	4.80816	7.94633e-05	0.0119934	1.60463	Up
ENSG00000163535	SGO2	1.05712	2.05599	4.78783	8.35382e-05	0.0124359	1.56349	Up
ENSG00000137976	DNASE2B	-1.38773	0.476733	-4.77154	8.69539e-05	0.0124705	1.54389	Down
ENSG00000179820	MYADM	-1.06461	6.99297	-4.78363	8.44055e-05	0.0124454	1.54232	Down
ENSG00000198826	ARHGAP11A	1.07359	0.840774	4.77409	8.64108e-05	0.0124705	1.5292	Up
ENSG00000153208	MERTK	-1.15312	4.00714	-4.77136	8.69919e-05	0.0124705	1.52788	Down
ENSG00000169607	CKAP2L	1.45186	1.56945	4.72134	9.83901e-05	0.0130812	1.41405	Up
ENSG00000144354	CDCA7	1.23282	2.83257	4.72054	9.85843e-05	0.0130812	1.39809	Up
ENSG00000092853	CLSPN	1.25228	1.1186	4.70259	0.000103041	0.0131841	1.37169	Up
ENSG00000189001	SBSN	1.78485	1.20237	4.6631	0.00011357	0.0139546	1.28522	Up
ENSG00000109805	NCAPG	1.54172	2.64161	4.6549	0.000115886	0.0140168	1.27987	Up
ENSG00000125384	PTGER2	-1.18138	3.50512	-4.65766	0.000115102	0.0140168	1.27247	Down
ENSG00000118503	TNFAIP3	-1.48667	6.00627	-4.66396	0.000113328	0.0139546	1.25504	Down
ENSG00000089685	BIRC5	1.6712	3.38165	4.63027	0.00012314	0.0146964	1.20826	Up
ENSG00000166793	YPEL4	-1.2529	2.04822	-4.61509	0.000127837	0.0150594	1.18189	Down
ENSG00000130844	ZNF331	-1.42623	4.18802	-4.61332	0.000128397	0.0150594	1.18067	Down
ENSG00000172578	KLHL6	-1.08592	2.07302	-4.60742	0.000130276	0.0151093	1.16542	Down
ENSG00000072571	HMMR	1.39252	2.08793	4.60587	0.000130775	0.0151093	1.15906	Up
ENSG00000170312	CDK1	1.69475	3.64359	4.58433	0.00013791	0.0156994	1.11015	Up
ENSG00000184661	CDCA2	1.4006	1.63383	4.55844	0.000147003	0.0161465	1.05359	Up
ENSG00000159388	BTG2	-1.54178	7.83941	-4.56253	0.000145529	0.0161465	1.05271	Down
ENSG00000123485	HJURP	1.75648	2.98369	4.51499	0.000163638	0.0171179	0.94671	Up
ENSG00000277157	H4C4	1.3227	0.558367	4.50042	0.000169629	0.017508	0.924721	Up
ENSG00000119138	KLF9	-1.50634	5.48019	-4.50604	0.000167294	0.0173829	0.888843	Down
ENSG00000106003	LFNG	1.06228	3.94193	4.47553	0.000180373	0.0182519	0.83995	Up
ENSG00000145386	CCNA2	1.41366	3.49505	4.45597	0.000189296	0.0186667	0.830908	Up
ENSG00000120738	EGR1	-2.33158	8.7878	-4.4209	0.000206411	0.0194479	0.751569	Down
ENSG00000116717	GADD45A	-1.18106	6.52994	-4.44292	0.000195492	0.0189524	0.749266	Down
ENSG00000137812	KNL1	1.06405	1.08122	4.4116	0.000211204	0.0194479	0.728336	Up
ENSG00000176890	TYMS	1.37248	4.65028	4.43939	0.000197204	0.0189524	0.726411	Up
ENSG00000186871	ERCC6L	1.20239	1.04128	4.40866	0.000212743	0.0194479	0.721622	Up
ENSG00000189292	ALKAL2	-1.8063	2.25246	-4.40981	0.000212143	0.0194479	0.706616	Down
ENSG00000113070	HBEGF	-1.35919	4.27993	-4.40064	0.000216997	0.0194479	0.657043	Down
ENSG00000189320	FAM180A	-1.35436	2.56465	-4.37131	0.000233293	0.0204119	0.627994	Down
ENSG00000163884	KLF15	-1.76835	4.05241	-4.35271	0.000244253	0.0208924	0.566448	Down
ENSG00000117650	NEK2	1.66919	2.44544	4.33217	0.000256955	0.0216205	0.548219	Up
ENSG00000051180	RAD51	1.06949	2.16067	4.30508	0.000274727	0.0220406	0.492005	Up
ENSG00000168078	PBK	1.62194	2.84553	4.2977	0.000279773	0.0220406	0.476986	Up
ENSG00000109674	NEIL3	1.14653	1.11591	4.29672	0.000280455	0.0220406	0.473674	Up
ENSG00000154359	LONRF1	-1.34449	4.27903	-4.30608	0.000274045	0.0220406	0.468922	Down
ENSG00000164109	MAD2L1	1.02479	2.49215	4.28885	0.000285951	0.0222467	0.453528	Up
ENSG00000197405	C5AR1	-1.5795	4.83875	-4.30169	0.00027703	0.0220406	0.449812	Down
ENSG00000157557	ETS2	-1.15188	5.84066	-4.31894	0.000265488	0.021756	0.443684	Down
ENSG00000143476	DTL	1.19753	1.92972	4.26285	0.000304903	0.0228044	0.398868	Up
ENSG00000112149	CD83	-1.0678	4.48935	-4.26858	0.000300623	0.0227036	0.357782	Down
ENSG00000109255	NMU	1.87355	3.44722	4.24028	0.000322362	0.0237657	0.331862	Up
ENSG00000151726	ACSL1	-1.45442	5.61158	-4.26644	0.000302216	0.0227131	0.325201	Down
ENSG00000118193	KIF14	1.26955	1.28839	4.22166	0.000337523	0.024533	0.307604	Up
ENSG00000075218	GTSE1	1.44716	2.39123	4.21526	0.00034289	0.0248067	0.286834	Up
ENSG00000161800	RACGAP1	1.1669	3.7588	4.22708	0.000333037	0.0243211	0.267953	Up
ENSG00000120251	GRIA2	1.22214	0.622051	4.19275	0.000362473	0.0255082	0.243356	Up
ENSG00000125089	SH3TC1	-1.02285	3.38926	-4.2006	0.000355522	0.025365	0.237636	Down
ENSG00000163923	RPL39L	1.0058	5.1048	4.23081	0.000329985	0.0242125	0.234115	Up
ENSG00000164611	PTTG1	1.61478	4.5807	4.20656	0.000350329	0.0251131	0.222311	Up
ENSG00000166592	RRAD	-1.40999	4.63502	-4.20651	0.00035037	0.0251131	0.20726	Down
ENSG00000157456	CCNB2	1.54719	3.53274	4.19451	0.0003609	0.0255082	0.194967	Up
ENSG00000122254	HS3ST2	-2.13837	1.47858	-4.16939	0.000383964	0.0256822	0.191031	Down
ENSG00000117724	CENPF	1.66178	2.73395	4.15526	0.000397576	0.0260817	0.155556	Up
ENSG00000137193	PIM1	-1.2197	6.3295	-4.18815	0.00036661	0.0255669	0.141862	Down
ENSG00000113368	LMNB1	1.42093	4.5254	4.16846	0.000384852	0.0256822	0.131079	Up
ENSG00000165480	SKA3	1.35791	2.30502	4.14187	0.000410925	0.0263991	0.130133	Up
ENSG00000115963	RND3	-1.09056	5.53782	-4.17765	0.000376228	0.0256597	0.116024	Down
ENSG00000177602	HASPIN	1.01749	0.850492	4.1209	0.000432725	0.0271551	0.0842812	Up
ENSG00000205177	C11orf91	-1.26978	0.858557	-4.12102	0.000432596	0.0271551	0.0783393	Down
ENSG00000108551	RASD1	-1.91727	5.53443	-4.13521	0.000417729	0.0266143	0.032184	Down
ENSG00000162804	SNED1	-1.07064	3.70115	-4.12042	0.000433232	0.0271551	0.0318817	Down
ENSG00000131747	TOP2A	1.80505	3.73896	4.11794	0.00043589	0.0272115	0.0314065	Up
ENSG00000135678	CPM	-1.50015	3.78689	-4.11518	0.000438871	0.0272876	0.016093	Down
ENSG00000152253	SPC25	1.36768	1.86049	4.07669	0.000482525	0.0286331	-0.0138341	Up
ENSG00000198932	GPRASP1	-1.44207	3.23557	-4.08309	0.000474973	0.0286331	-0.0282072	Down
ENSG00000162711	NLRP3	-1.54683	2.30959	-4.06646	0.000494834	0.029019	-0.0420861	Down
ENSG00000136244	IL6	-2.72457	3.3074	-4.08276	0.000475364	0.0286331	-0.0504597	Down
ENSG00000150907	FOXO1	-1.33133	4.61418	-4.08307	0.000474999	0.0286331	-0.0698236	Down
ENSG00000148773	MKI67	1.90701	3.15166	4.04353	0.000523581	0.0296871	-0.0947767	Up
ENSG00000086544	ITPKC	-1.08306	5.76312	-4.07803	0.000480931	0.0286331	-0.119576	Down
ENSG00000121152	NCAPH	1.35153	2.0527	4.02812	0.000543824	0.029981	-0.124857	Up
ENSG00000275896	PRSS2	1.75668	1.79836	4.02642	0.000546094	0.029981	-0.126174	Up
ENSG00000170345	FOS	-2.27431	9.10647	-4.01993	0.000554897	0.0302335	-0.143249	Down
ENSG00000169679	BUB1	1.45526	2.45645	4.01944	0.000555564	0.0302335	-0.144927	Up
ENSG00000077152	UBE2T	1.22754	3.74398	4.05794	0.000505331	0.0294496	-0.156748	Up
ENSG00000179772	FOXS1	1.24188	2.71441	4.04871	0.000516944	0.0295326	-0.160573	Up
ENSG00000174371	EXO1	1.32038	1.56435	4.00998	0.000568642	0.0302669	-0.161082	Up
ENSG00000134775	FHOD3	-1.02402	1.91415	-3.98217	0.000608902	0.0314074	-0.229425	Down
ENSG00000139832	RAB20	-1.07856	5.53579	-4.0098	0.000568896	0.0302669	-0.263252	Down
ENSG00000182950	ODF3L1	-1.59877	1.54954	-3.96192	0.000639984	0.0322744	-0.267709	Down
ENSG00000112984	KIF20A	1.84982	3.11378	3.9603	0.000642547	0.0322984	-0.294075	Up
ENSG00000130653	PNPLA7	-1.06738	3.11343	-3.95725	0.000647378	0.0323313	-0.29474	Down
ENSG00000166523	CLEC4E	-1.19628	2.24252	-3.93711	0.000680227	0.0332217	-0.32272	Down
ENSG00000156970	BUB1B	1.37128	2.53451	3.94226	0.000671662	0.0329072	-0.347595	Up
ENSG00000122863	CHST3	-1.07592	3.95805	-3.95323	0.000653807	0.0324431	-0.359153	Down
ENSG00000137807	KIF23	1.26728	2.91179	3.8953	0.000753766	0.0351676	-0.453206	Up
ENSG00000161960	EIF4A1	-1.08804	2.83525	-3.89034	0.000762995	0.0352618	-0.477712	Down
ENSG00000189057	FAM111B	1.44747	1.96968	3.86591	0.000810123	0.0364603	-0.479348	Up
ENSG00000099985	OSM	-1.41737	1.90773	-3.86042	0.000821109	0.0365294	-0.492927	Down
ENSG00000120875	DUSP4	-1.20711	2.75299	-3.86317	0.000815585	0.0364939	-0.49315	Down
ENSG00000196584	XRCC2	1.28178	1.97581	3.85925	0.000823456	0.0365294	-0.49843	Up
ENSG00000007968	E2F2	1.35767	1.49693	3.8554	0.00083128	0.0367711	-0.501981	Up
ENSG00000146670	CDCA5	1.35665	3.21978	3.87094	0.000800186	0.0362236	-0.50397	Up
ENSG00000102760	RGCC	-1.3116	7.21776	-3.89208	0.000759749	0.0352169	-0.511653	Down
ENSG00000134057	CCNB1	1.37062	4.96372	3.89528	0.000753797	0.0351676	-0.524464	Up
ENSG00000136457	CHAD	-1.23201	0.964326	-3.84229	0.000858417	0.0376488	-0.539629	Down
ENSG00000163808	KIF15	1.22885	2.09454	3.83415	0.000875713	0.0376893	-0.554142	Up
ENSG00000196188	CTSE	1.12216	1.00052	3.82275	0.000900521	0.0376893	-0.574028	Up
ENSG00000129173	E2F8	1.4573	1.75194	3.82319	0.000899542	0.0376893	-0.575244	Up
ENSG00000115163	CENPA	1.65072	2.61967	3.82034	0.000905841	0.0376996	-0.60033	Up
ENSG00000102362	SYTL4	-1.15111	2.68958	-3.8275	0.000890109	0.0376893	-0.622843	Down
ENSG00000165949	IFI27	1.18999	6.56433	3.85311	0.000835954	0.0368725	-0.645282	Up
ENSG00000137331	IER3	-1.28758	3.42197	-3.81687	0.000913576	0.0378181	-0.654118	Down
ENSG00000147119	CHST7	-1.35459	3.14757	-3.8063	0.000937535	0.0380451	-0.655603	Down
ENSG00000140534	TICRR	1.18778	1.16341	3.77984	0.00100025	0.0389092	-0.668002	Up
ENSG00000106462	EZH2	1.15917	3.87607	3.8023	0.000946774	0.0382714	-0.68324	Up
ENSG00000135625	EGR4	-1.14501	0.337526	-3.77122	0.00102157	0.0391581	-0.686632	Down
ENSG00000166816	LDHD	-1.44642	2.78335	-3.79189	0.000971197	0.0386577	-0.709855	Down
ENSG00000140479	PCSK6	-1.39183	0.930557	-3.72369	0.00114737	0.0419771	-0.791166	Down
ENSG00000155926	SLA	-1.00292	3.60895	-3.74025	0.0011019	0.0411074	-0.792625	Down
ENSG00000171848	RRM2	1.41749	2.60282	3.72422	0.00114589	0.0419771	-0.806618	Up
ENSG00000011426	ANLN	1.52964	2.89382	3.72541	0.00114257	0.0419771	-0.829322	Up
ENSG00000090889	KIF4A	1.55101	2.44329	3.71237	0.00117953	0.0422719	-0.830755	Up
ENSG00000101003	GINS1	1.26415	2.98201	3.71415	0.00117441	0.0422719	-0.834288	Up
ENSG00000125845	BMP2	-1.48924	2.36612	-3.71782	0.00116394	0.0422719	-0.835786	Down
ENSG00000140451	PIF1	1.16608	2.61145	3.71684	0.00116674	0.0422719	-0.848007	Up
ENSG00000073756	PTGS2	-1.44367	2.03003	-3.70907	0.00118906	0.0423195	-0.852057	Down
ENSG00000101447	FAM83D	1.66334	3.12606	3.70967	0.00118734	0.0423195	-0.853726	Up
ENSG00000088325	TPX2	1.74974	4.46857	3.74324	0.00109388	0.040907	-0.866843	Up
ENSG00000134690	CDCA8	1.61936	3.47781	3.71468	0.00117291	0.0422719	-0.867466	Up
ENSG00000161888	SPC24	1.56705	3.38118	3.69007	0.00124548	0.0434291	-0.88939	Up
ENSG00000133063	CHIT1	-2.38535	1.1638	-3.67835	0.00128159	0.0441345	-0.891946	Down
ENSG00000135094	SDS	-1.71976	2.94876	-3.67802	0.0012826	0.0441345	-0.912184	Down
ENSG00000204983	PRSS1	1.32558	0.908899	3.66645	0.00131928	0.0447007	-0.916018	Up
ENSG00000173276	ZBTB21	-1.09103	2.91104	-3.66639	0.00131948	0.0447007	-0.938383	Down
ENSG00000121211	MND1	1.14242	2.3655	3.64191	0.00140051	0.0459379	-0.974251	Up
ENSG00000087494	PTHLH	-1.5308	1.75511	-3.63331	0.00143015	0.0460959	-0.9891	Down
ENSG00000129810	SGO1	1.13639	1.53921	3.63189	0.0014351	0.0460959	-0.991559	Up
ENSG00000131196	NFATC1	-1.19547	3.06958	-3.65353	0.00136147	0.0456239	-1.0001	Down
ENSG00000018625	ATP1A2	-1.60238	2.11306	-3.66159	0.00133498	0.0449814	-1.02634	Down
ENSG00000158402	CDC25C	1.26923	1.62112	3.60545	0.00153038	0.0465487	-1.05262	Up
ENSG00000205038	PKHD1L1	1.62255	1.17597	3.66824	0.00131354	0.0447007	-1.0535	Up
ENSG00000068489	PRR11	1.10261	2.31866	3.60148	0.00154521	0.0467587	-1.05946	Up
ENSG00000142945	KIF2C	1.55741	3.33464	3.63233	0.00143355	0.0460959	-1.06433	Up
ENSG00000133874	RNF122	-1.04757	4.96255	-3.65237	0.00136532	0.045654	-1.06954	Down
ENSG00000111665	CDCA3	1.30059	2.53765	3.60118	0.00154634	0.0467587	-1.07092	Up
ENSG00000099625	CBARP	-1.62943	2.13326	-3.59173	0.00158223	0.0473412	-1.08	Down
ENSG00000111206	FOXM1	1.58215	3.70381	3.61504	0.0014951	0.0464494	-1.09082	Up
ENSG00000237649	KIFC1	1.51265	3.16434	3.59832	0.00155712	0.0469323	-1.10121	Up
ENSG00000079215	SLC1A3	-1.08393	4.68637	-3.64225	0.00139935	0.0459379	-1.10504	Down
ENSG00000157502	PWWP3B	-2.33068	2.96825	-3.55787	0.00171777	0.0495241	-1.15576	Down
ENSG00000101443	WFDC2	2.19609	8.51204	3.61592	0.00149191	0.0464494	-1.16241	Up
ENSG00000167757	KLK11	1.57073	4.29931	3.59805	0.00155815	0.0469323	-1.16334	Up
ENSG00000123975	CKS2	1.02847	6.39664	3.60649	0.00152651	0.0465226	-1.18952	Up
ENSG00000175063	UBE2C	1.8138	5.36902	3.60413	0.00153528	0.0466064	-1.20667	Up
ENSG00000134531	EMP1	-1.14566	6.63613	-3.59002	0.00158883	0.0473957	-1.21945	Down
ENSG00000115112	TFCP2L1	-1.39798	2.78073	-3.57097	0.00166402	0.0485167	-1.25681	Down
ENSG00000131650	KREMEN2	1.08896	2.08047	3.56416	0.00169173	0.0491396	-1.27329	Up
