# Supplementary material for: Scandare: A Successful, Flexible, Prospective, and Longitudinal Biobank Framework
Source: Research Square preprint supplement (doi:10.21203/rs.3.rs-7354298/v1), 2025-08-18
Supplement: Supplementary file 11 [file fb0761c85cc9fd279b4029b1.xlsx]

## Sheet: SCAN-TNBC_DEG_supersurivors_FDR
gene_name	gene_id	logFC	AveExpr	t	P.Value	adj.P.Val	B
PON3	ENSG00000105852	-3.608	2.63868	-9.24616	1.95282e-14	3.11494e-10	22.166
ABCC12	ENSG00000140798	-3.88406	0.173469	-8.86543	1.13709e-13	9.06888e-10	20.0429
GJB1	ENSG00000169562	-4.01223	0.625526	-8.59948	3.89204e-13	2.0694e-09	19.1507
ACSM1	ENSG00000166743	-4.37035	1.04776	-8.03467	5.27681e-12	1.74359e-08	16.8021
SRMS	ENSG00000125508	-3.46923	1.56678	-8.02704	5.46545e-12	1.74359e-08	16.773
HSPA2	ENSG00000126803	-2.47337	3.14949	-6.95174	7.33336e-10	1.94957e-06	12.2194
DHRS2	ENSG00000100867	-3.83313	0.44476	-6.66689	2.62032e-09	5.97097e-06	10.8807
FBXL8	ENSG00000135722	-1.33853	3.32968	-6.3459	1.08146e-08	2.11056e-05	9.6618
UGT2B11	ENSG00000213759	-4.75926	0.418846	-6.32391	1.19084e-08	2.11056e-05	9.54573
MS4A15	ENSG00000166961	-3.27096	0.499272	-6.21364	1.92764e-08	2.84835e-05	9.0131
MYOM2	ENSG00000036448	-3.21228	0.429073	-6.20931	1.96426e-08	2.84835e-05	8.96276
LGALS12	ENSG00000133317	-2.69353	0.93119	-6.10406	3.10232e-08	4.12376e-05	8.58499
SERHL2	ENSG00000183569	-4.24653	2.21385	-6.06524	3.66942e-08	4.50238e-05	8.5238
SORD	ENSG00000140263	-2.19125	3.19317	-6.04501	4.00427e-08	4.5623e-05	8.44008
HSD17B2	ENSG00000086696	-2.68754	1.24664	-5.97066	5.51534e-08	5.49845e-05	8.07339
LRRC31	ENSG00000114248	-3.25434	0.215242	-5.98012	5.29555e-08	5.49845e-05	8.04828
FMO5	ENSG00000131781	-2.63505	1.83405	-5.88745	7.87871e-08	7.39255e-05	7.77478
SDR16C5	ENSG00000170786	-3.37609	1.20568	-5.80863	1.10268e-07	9.73327e-05	7.45479
TMEM63C	ENSG00000165548	-2.96247	2.16431	-5.79683	1.15938e-07	9.73327e-05	7.43106
GPC5	ENSG00000179399	-2.08539	0.576019	-5.77602	1.26656e-07	0.000101015	7.19311
TRIM36	ENSG00000152503	-2.24959	2.51392	-5.69117	1.81385e-07	0.000137775	7.00541
PTK6	ENSG00000101213	-2.84073	2.71771	-5.60101	2.65071e-07	0.000183833	6.65972
SLC25A18	ENSG00000182902	-2.71578	0.417743	-5.60616	2.59399e-07	0.000183833	6.56676
TMEM62	ENSG00000137842	-1.3095	4.61689	-5.5638	3.09778e-07	0.000205887	6.50993
MUCL1	ENSG00000172551	-5.21599	2.04192	-5.53921	3.43302e-07	0.000219041	6.41663
KLHL31	ENSG00000124743	-1.89517	1.91783	-5.52618	3.62486e-07	0.000222385	6.32536
SPINK8	ENSG00000229453	-3.94199	1.02746	-5.49941	4.05265e-07	0.000233845	6.25356
GGT1	ENSG00000100031	-1.85393	1.14178	-5.49634	4.10486e-07	0.000233845	6.15058
HGD	ENSG00000113924	-2.62628	1.70677	-5.47981	4.39705e-07	0.000241853	6.16746
PON1	ENSG00000005421	-2.02872	0.479645	-5.43111	5.3818e-07	0.00028615	5.87262
HPGD	ENSG00000164120	-3.48101	2.07541	-5.40951	5.88483e-07	0.000293373	5.9112
IVD	ENSG00000128928	-1.24879	4.68278	-5.40949	5.88548e-07	0.000293373	5.90409
ABCC11	ENSG00000121270	-4.09606	1.25056	-5.40134	6.08695e-07	0.000294221	5.87908
CCNO	ENSG00000152669	-2.76635	1.78006	-5.38712	6.45503e-07	0.000298363	5.82022
ATP13A4	ENSG00000127249	-3.14104	2.4189	-5.37702	6.7297e-07	0.000298363	5.78478
SCP2	ENSG00000116171	-1.39555	5.55261	-5.37023	6.92084e-07	0.000298363	5.75359
PFKFB1	ENSG00000158571	-2.05381	1.67511	-5.37498	6.78666e-07	0.000298363	5.74143
ABCA12	ENSG00000144452	-3.17988	1.38744	-5.33085	8.13854e-07	0.000341626	5.6004
CES3	ENSG00000172828	-2.67277	1.8093	-5.31498	8.68657e-07	0.000355281	5.54552
TMEM45B	ENSG00000151715	-2.99074	1.06833	-5.25262	1.1212e-06	0.000428214	5.29277
TSPAN8	ENSG00000127324	-3.41704	0.860378	-5.25124	1.12752e-06	0.000428214	5.28819
NAT2	ENSG00000156006	-2.58572	0.386475	-5.2575	1.0991e-06	0.000428214	5.25378
AKR1B15	ENSG00000227471	-3.90977	1.82705	-5.24393	1.16167e-06	0.000430926	5.27332
ZNF350	ENSG00000256683	-1.28072	4.05898	-5.22358	1.26212e-06	0.000457549	5.19001
PPP1R14D	ENSG00000166143	-1.92509	0.612385	-5.21034	1.33202e-06	0.000472155	5.0622
MPV17L	ENSG00000156968	-2.44976	0.480279	-5.20377	1.36808e-06	0.000474396	5.05563
SEC14L2	ENSG00000100003	-1.738	3.63865	-5.17261	1.55256e-06	0.000526912	4.998
FCN2	ENSG00000160339	-3.06016	0.703876	-5.15498	1.66747e-06	0.000554123	4.9135
SLC26A3	ENSG00000091138	-2.75181	0.119925	-5.11451	1.96375e-06	0.000639262	4.72211
MYBPC1	ENSG00000196091	-3.63357	2.14027	-5.05568	2.48799e-06	0.00079372	4.55831
MCCC2	ENSG00000131844	-1.44588	5.29652	-5.02873	2.77176e-06	0.000866908	4.44634
LRRC26	ENSG00000184709	-2.62059	1.50685	-5.00469	3.05128e-06	0.000935981	4.37611
ENTPD5	ENSG00000187097	-1.05622	3.69518	-4.95526	3.71534e-06	0.00110596	4.18774
PFKFB2	ENSG00000123836	-1.19381	4.36567	-4.94863	3.81445e-06	0.00110596	4.14791
ST6GALNAC1	ENSG00000070526	-2.36123	0.617044	-4.94416	3.88274e-06	0.00110596	4.11629
FGL1	ENSG00000104760	-2.13672	0.0666615	-4.95309	3.74753e-06	0.00110596	4.11496
RNLS	ENSG00000184719	-1.3254	2.07143	-4.92083	4.25909e-06	0.00119187	4.05975
ABCC2	ENSG00000023839	-2.26242	1.68334	-4.90771	4.4861e-06	0.00119263	4.01729
HAO2	ENSG00000116882	-1.86334	0.357618	-4.91025	4.44122e-06	0.00119263	3.96618
VSTM2L	ENSG00000132821	-2.70436	2.49355	-4.85969	5.42197e-06	0.0014178	3.82878
PPP1R36	ENSG00000165807	-1.49254	0.961386	-4.82265	6.27129e-06	0.00161344	3.66989
AFMID	ENSG00000183077	-1.64017	4.83473	-4.79853	6.89286e-06	0.00174521	3.58958
SRPK3	ENSG00000184343	-2.21209	1.60738	-4.77712	7.49423e-06	0.00186782	3.54802
WWC1	ENSG00000113645	-1.50746	4.49705	-4.77109	7.67269e-06	0.00188288	3.48848
CBWD3	ENSG00000196873	-1.11231	2.0534	-4.76537	7.84564e-06	0.00189615	3.49562
FGGY	ENSG00000172456	-1.12854	2.72564	-4.76048	7.99661e-06	0.00189839	3.48919
PCLO	ENSG00000186472	-2.13663	2.70317	-4.75741	8.09295e-06	0.00189839	3.46734
KYAT1	ENSG00000171097	-1.34451	1.14493	-4.74157	8.60753e-06	0.00197097	3.38759
C1orf116	ENSG00000182795	-2.54183	4.44299	-4.74032	8.64949e-06	0.00197097	3.38119
CFAP161	ENSG00000156206	-1.40795	1.85261	-4.71524	9.53429e-06	0.00211224	3.32143
SLC43A1	ENSG00000149150	-1.41883	3.56888	-4.70125	1.00652e-05	0.00216967	3.25533
RLN3	ENSG00000171136	-1.92862	0.0762427	-4.70124	1.00656e-05	0.00216967	3.23007
PPEF1	ENSG00000086717	-1.92377	1.91421	-4.68131	1.0872e-05	0.00228183	3.20677
C4A	ENSG00000244731	-2.56688	2.70978	-4.65943	1.18302e-05	0.0024507	3.11092
CDRT1	ENSG00000241322	-1.69818	1.07006	-4.60935	1.4341e-05	0.0028956	2.93721
PPFIA3	ENSG00000177380	-1.94832	3.24457	-4.61028	1.42903e-05	0.0028956	2.92491
ACSBG1	ENSG00000103740	-2.68818	0.401308	-4.58961	1.5467e-05	0.00308392	2.87438
ELOVL7	ENSG00000164181	-2.00279	3.71095	-4.58092	1.59893e-05	0.00314871	2.80751
SRD5A1	ENSG00000145545	-2.04439	4.80736	-4.57104	1.66042e-05	0.00322992	2.76978
SYCP1	ENSG00000198765	-2.32865	0.276186	-4.56036	1.72942e-05	0.00332361	2.76263
C9orf152	ENSG00000188959	-2.64688	1.82166	-4.54599	1.8267e-05	0.00346648	2.71903
SCN3B	ENSG00000166257	-1.67197	0.543843	-4.53861	1.8787e-05	0.00346648	2.68223
FITM2	ENSG00000197296	-1.29871	3.86294	-4.53994	1.86921e-05	0.00346648	2.67123
PIP	ENSG00000159763	-4.71485	2.33435	-4.53547	1.90127e-05	0.00346648	2.65472
ALOX15B	ENSG00000179593	-3.29134	2.67771	-4.53393	1.91242e-05	0.00346648	2.64923
KLRF1	ENSG00000150045	-2.1244	1.97789	-4.51936	2.0212e-05	0.00361594	2.63651
LRG1	ENSG00000171236	-2.57746	2.01855	-4.51689	2.04021e-05	0.00361594	2.61951
RIMS1	ENSG00000079841	-1.98013	0.769054	-4.5132	2.06895e-05	0.00362657	2.60581
ESRRG	ENSG00000196482	-2.27386	1.97532	-4.5052	2.1326e-05	0.0036975	2.58417
SYTL5	ENSG00000147041	-2.32574	0.577349	-4.49777	2.19346e-05	0.00371983	2.55557
EFNA3	ENSG00000143590	-1.90052	3.16395	-4.49738	2.19667e-05	0.00371983	2.5303
ALOX15	ENSG00000161905	-2.1838	0.802815	-4.47653	2.3768e-05	0.00394919	2.48642
CUX2	ENSG00000111249	-2.16495	0.827902	-4.47293	2.40934e-05	0.003962	2.4734
CROT	ENSG00000005469	-1.72548	3.77167	-4.46557	2.4771e-05	0.00399113	2.40516
AKR7A3	ENSG00000162482	-1.7343	2.94168	-4.46084	2.52163e-05	0.00402225	2.41811
CXCL17	ENSG00000189377	-3.86982	2.89215	-4.45729	2.55563e-05	0.00403612	2.37327
AQP3	ENSG00000165272	-2.72856	4.37807	-4.43262	2.80398e-05	0.00438493	2.28439
FAM234B	ENSG00000084444	-1.54104	3.52182	-4.41966	2.94365e-05	0.00455865	2.25778
PXMP4	ENSG00000101417	-1.84141	3.61644	-4.39587	3.21782e-05	0.00486938	2.15955
ZNF613	ENSG00000176024	-1.03621	3.60699	-4.38065	3.40602e-05	0.00507752	2.13156
MISP3	ENSG00000141854	-1.78383	2.41662	-4.37136	3.52604e-05	0.00520776	2.11526
ARL4C	ENSG00000188042	1.20443	6.85322	4.36118	3.66224e-05	0.0053593	2.02693
ACADM	ENSG00000117054	-1.19801	5.3558	-4.34837	3.84089e-05	0.00556964	1.98342
TBC1D24	ENSG00000162065	-1.22753	3.98619	-4.33778	3.99504e-05	0.00571076	1.95989
CECR2	ENSG00000099954	-2.36941	1.34043	-4.32813	4.14047e-05	0.00578617	1.98766
SLC1A1	ENSG00000106688	-1.81342	2.8257	-4.32611	4.17159e-05	0.00578617	1.9529
ZNF518B	ENSG00000178163	-1.27966	4.96819	-4.3269	4.15937e-05	0.00578617	1.90746
ANKRD9	ENSG00000156381	-1.3092	3.71405	-4.31707	4.3136e-05	0.00593158	1.89407
CHP1	ENSG00000187446	-1.11412	6.49431	-4.30882	4.4472e-05	0.00606301	1.86322
PHYHD1	ENSG00000175287	-2.01962	2.40279	-4.30566	4.49959e-05	0.00608245	1.89575
TMED3	ENSG00000166557	-1.22181	4.30983	-4.27938	4.95767e-05	0.00658999	1.74911
MARVELD2	ENSG00000152939	-1.26037	1.95554	-4.26087	5.307e-05	0.00699603	1.76617
GSTM4	ENSG00000168765	-1.19265	3.02797	-4.25832	5.35689e-05	0.00700392	1.72126
SEMA3E	ENSG00000170381	-2.27282	1.31283	-4.25368	5.44889e-05	0.00706628	1.74153
ICA1	ENSG00000003147	-1.42057	4.61378	-4.23882	5.75414e-05	0.00740196	1.6054
ASB4	ENSG00000005981	-1.48284	0.272222	-4.21325	6.31811e-05	0.00806241	1.59742
TTC36	ENSG00000172425	-1.29412	2.18402	-4.19134	6.84351e-05	0.00859534	1.53237
CYP2J2	ENSG00000134716	-2.13251	3.08129	-4.19298	6.8028e-05	0.00859534	1.47577
SEPHS2	ENSG00000179918	-1.36267	6.62107	-4.18334	7.04552e-05	0.00874992	1.44385
SGPP2	ENSG00000163082	-2.22641	3.76081	-4.18101	7.10545e-05	0.00874992	1.41457
ARHGEF37	ENSG00000183111	-1.50965	4.44887	-4.18002	7.13115e-05	0.00874992	1.40715
ATP1A4	ENSG00000132681	-1.75343	0.319989	-4.16491	7.5332e-05	0.00917267	1.44513
ATP13A5	ENSG00000187527	-2.70415	2.40137	-4.15353	7.85059e-05	0.00948673	1.35823
PSD	ENSG00000059915	-1.62372	1.73277	-4.14455	8.10995e-05	0.00972645	1.37978
TLCD4	ENSG00000152078	-1.66597	2.94817	-4.1347	8.4037e-05	0.0100035	1.29253
ACSS3	ENSG00000111058	-1.58955	2.09798	-4.12378	8.74157e-05	0.0103286	1.30702
OCLN	ENSG00000197822	-1.53893	3.11218	-4.11965	8.87297e-05	0.0104068	1.2498
NRXN3	ENSG00000021645	-1.74433	1.42941	-4.11443	9.04116e-05	0.0104504	1.28772
P2RY2	ENSG00000175591	-2.07023	2.97118	-4.11465	9.03413e-05	0.0104504	1.22611
ALX1	ENSG00000180318	-1.97627	0.467838	-4.10045	9.50775e-05	0.0109107	1.24181
SC5D	ENSG00000109929	-1.53366	4.04386	-4.07811	0.000103015	0.0117371	1.07305
TMEM151A	ENSG00000179292	-1.93843	0.418384	-4.0711	0.000105635	0.0118661	1.14818
SULT2B1	ENSG00000088002	-2.04761	1.56107	-4.07145	0.000105503	0.0118661	1.14236
LIN7B	ENSG00000104863	-1.00734	3.21875	-4.04288	0.000116845	0.0129366	1.01426
ZNF680	ENSG00000173041	-1.01747	4.97544	-4.03915	0.000118409	0.0129366	0.934031
SLC9A5	ENSG00000135740	-1.18465	1.86938	-4.02547	0.000124319	0.0133987	1.00192
HMGCS2	ENSG00000134240	-3.29673	0.940822	-4.02653	0.00012385	0.0133987	0.989073
GCNT3	ENSG00000140297	-1.91344	0.121732	-4.02314	0.000125351	0.0134193	0.995509
FIBCD1	ENSG00000130720	-2.39772	0.756566	-4.01979	0.000126854	0.0134438	0.983403
CAB39L	ENSG00000102547	-1.43234	3.8509	-4.01857	0.000127406	0.0134438	0.883921
SLC44A3	ENSG00000143036	-1.43567	3.96919	-4.01702	0.000128108	0.0134438	0.870225
C14orf39	ENSG00000179008	-1.77374	0.702446	-4.01257	0.000130149	0.0134806	0.963308
ONECUT2	ENSG00000119547	-2.26579	1.41363	-3.98964	0.00014117	0.0141623	0.873879
PLAAT2	ENSG00000133328	-2.30244	1.58321	-3.98173	0.000145174	0.0144729	0.836586
FAH	ENSG00000103876	-1.33655	3.47934	-3.97422	0.000149076	0.0147696	0.760585
MPHOSPH6	ENSG00000135698	-1.2856	5.71574	-3.95695	0.000158437	0.0155045	0.674006
SLC26A1	ENSG00000145217	-1.55543	0.369077	-3.9497	0.000162532	0.0157124	0.765158
ENPP3	ENSG00000154269	-2.287	1.59017	-3.94438	0.000165602	0.0159128	0.731085
OSGIN1	ENSG00000140961	-1.16417	2.29828	-3.93499	0.000171154	0.0160073	0.705291
FBN2	ENSG00000138829	-1.97068	2.82426	-3.93681	0.000170065	0.0160073	0.663083
TSSK4	ENSG00000139908	-1.10899	0.943865	-3.9267	0.000176205	0.0162984	0.6945
MYLK3	ENSG00000140795	-1.7057	0.462111	-3.92579	0.000176768	0.0162984	0.691778
RORC	ENSG00000143365	-1.96232	2.88206	-3.9168	0.000182426	0.0166279	0.583482
ALDH3B2	ENSG00000132746	-2.76979	4.50222	-3.91722	0.000182157	0.0166279	0.551662
IDI1	ENSG00000067064	-1.78639	5.94766	-3.91429	0.000184032	0.0166789	0.552047
MYO5C	ENSG00000128833	-1.28222	4.66219	-3.90879	0.000187609	0.0169071	0.509156
LBP	ENSG00000129988	-3.43227	2.18568	-3.87137	0.000213749	0.0189417	0.430817
P2RY1	ENSG00000169860	-1.33897	2.62858	-3.85503	0.000226232	0.0195117	0.438492
CLDN8	ENSG00000156284	-2.85998	3.34514	-3.84895	0.000231045	0.019708	0.328131
B3GAT1	ENSG00000109956	-2.16458	1.57895	-3.84662	0.000232921	0.0197623	0.418252
ASPHD1	ENSG00000174939	-1.98317	2.36816	-3.837	0.000240803	0.020323	0.337775
HSF4	ENSG00000102878	-1.32731	4.13169	-3.82858	0.000247912	0.020748	0.264144
LRTOMT	ENSG00000184154	-1.10223	1.41854	-3.82325	0.000252521	0.020979	0.375143
CBLN4	ENSG00000054803	-1.54345	0.584706	-3.82031	0.000255088	0.0210824	0.368512
WFDC3	ENSG00000124116	-1.35897	1.23391	-3.81258	0.000261977	0.0215402	0.34251
ZNF296	ENSG00000170684	-1.30829	3.22829	-3.80135	0.0002723	0.022048	0.223357
KYNU	ENSG00000115919	-1.73011	3.06943	-3.79872	0.000274774	0.022136	0.21795
GATM	ENSG00000171766	-1.37576	3.45373	-3.78571	0.000287325	0.0229156	0.159717
TMEM134	ENSG00000172663	-1.06411	4.29612	-3.78334	0.000289669	0.0229876	0.115699
LDHD	ENSG00000166816	-1.9551	2.09885	-3.7529	0.000321466	0.0251358	0.125019
RNF133	ENSG00000188050	-1.41793	2.28451	-3.75126	0.000323262	0.0251529	0.126286
SCNN1A	ENSG00000111319	-2.37215	3.01848	-3.74865	0.000326156	0.025255	0.0241144
IL1RAPL2	ENSG00000189108	-1.69011	0.372601	-3.7377	0.000338556	0.0259832	0.119832
ACE2	ENSG00000130234	-1.5746	0.171107	-3.7349	0.00034179	0.0259832	0.112135
SULT1C2	ENSG00000198203	-1.55276	1.19856	-3.73289	0.000344138	0.0259832	0.100428
MOGAT2	ENSG00000166391	-2.10959	1.66285	-3.73264	0.000344432	0.0259832	0.0738908
FLNA	ENSG00000196924	1.15505	9.55813	3.73698	0.000339379	0.0259832	0.0258679
EBPL	ENSG00000123179	-1.34451	5.6066	-3.73187	0.000345335	0.0259832	-0.0465052
ZNF689	ENSG00000156853	-1.09305	3.84815	-3.72483	0.000353701	0.0263401	-0.0489793
SOCS3	ENSG00000184557	1.95401	7.75308	3.72355	0.000355237	0.0263401	-0.0753765
ZSCAN31	ENSG00000235109	-1.36759	3.64573	-3.71854	0.000361335	0.0265606	-0.0603012
TBC1D30	ENSG00000111490	-1.16463	1.34833	-3.71315	0.000368001	0.0268036	0.0420014
NUDT8	ENSG00000167799	-1.41503	3.68387	-3.71361	0.000367427	0.0268036	-0.0854855
MSMB	ENSG00000263639	-2.2286	0.921659	-3.70554	0.000377604	0.027378	0.011759
GOT1	ENSG00000120053	-1.09653	5.28598	-3.70107	0.000383362	0.0276697	-0.149597
TBX6	ENSG00000149922	-1.12602	1.62218	-3.69959	0.000385288	0.0276835	-0.00198962
GHR	ENSG00000112964	-1.58692	2.94047	-3.69279	0.000394249	0.0280744	-0.0927743
SLC5A5	ENSG00000105641	-1.57532	0.410578	-3.68948	0.000398685	0.0282254	-0.0234436
BOK	ENSG00000176720	-1.39788	5.44125	-3.68726	0.000401678	0.0282254	-0.185997
IGFN1	ENSG00000163395	-1.33799	0.238104	-3.68272	0.000407886	0.0284113	-0.0422345
HOMER2	ENSG00000103942	-1.30764	3.43396	-3.68389	0.000406275	0.0284113	-0.164596
TMPRSS11E	ENSG00000087128	-1.73471	0.368288	-3.68044	0.000411036	0.0284431	-0.0505273
CYSRT1	ENSG00000197191	-1.30436	0.898517	-3.67981	0.000411909	0.0284431	-0.0536364
KCNJ11	ENSG00000187486	-1.6127	1.71873	-3.67435	0.000419556	0.0288463	-0.0912442
AFF2	ENSG00000155966	-1.52241	1.07967	-3.66884	0.000427404	0.0292597	-0.0893059
NKAIN4	ENSG00000101198	-1.68976	0.203716	-3.64908	0.000456742	0.0307281	-0.142008
TTC29	ENSG00000137473	-1.54617	0.176892	-3.64659	0.000460576	0.0307281	-0.148656
KLHL35	ENSG00000149243	-1.41098	2.16488	-3.64633	0.000460986	0.0307281	-0.193281
ARHGAP32	ENSG00000134909	-1.23398	4.98087	-3.65031	0.000454871	0.0307281	-0.308001
SLC5A11	ENSG00000158865	-1.61166	0.818553	-3.64153	0.000468461	0.030821	-0.167736
CKMT1B	ENSG00000237289	-1.86272	1.80923	-3.64084	0.000469532	0.030821	-0.216229
ACACA	ENSG00000278540	-1.00836	4.97353	-3.64201	0.000467708	0.030821	-0.333714
SLC30A8	ENSG00000164756	-1.88625	0.324134	-3.63919	0.000472135	0.0308649	-0.174821
NOX5	ENSG00000255346	-1.38646	0.662266	-3.63495	0.000478886	0.0311003	-0.184612
PMEL	ENSG00000185664	-1.82515	1.24077	-3.63129	0.000484793	0.0311003	-0.211047
TMC5	ENSG00000103534	-2.71675	1.57633	-3.63086	0.000485484	0.0311003	-0.26013
COL4A1	ENSG00000187498	1.48384	7.22178	3.62439	0.000496099	0.031527	-0.383902
WFDC10B	ENSG00000182931	-1.56032	0.911368	-3.6222	0.000499745	0.0316327	-0.22583
EPHX1	ENSG00000143819	-1.3764	6.41019	-3.61257	0.000516051	0.0324076	-0.393918
SLC13A3	ENSG00000158296	-1.34622	2.72663	-3.60498	0.000529274	0.0329783	-0.346807
CHST1	ENSG00000175264	-1.92528	2.63604	-3.59483	0.000547444	0.0337154	-0.385308
FBXL16	ENSG00000127585	-1.87162	2.38965	-3.59572	0.000545826	0.0337154	-0.389935
RNF148	ENSG00000235631	-1.49858	2.40615	-3.58922	0.000557746	0.0340866	-0.373105
CCDC169	ENSG00000242715	-1.59738	0.852393	-3.58396	0.00056756	0.0344226	-0.337245
GREM2	ENSG00000180875	-1.82259	1.01704	-3.58023	0.000574631	0.0345623	-0.353863
NOSTRIN	ENSG00000163072	-1.3683	2.27128	-3.57275	0.000589048	0.0350593	-0.415431
GUSB	ENSG00000169919	-1.40737	5.89914	-3.57284	0.000588868	0.0350593	-0.523862
HOXA7	ENSG00000122592	-1.93824	1.82937	-3.5625	0.000609363	0.0359758	-0.453156
ADCY10	ENSG00000143199	-1.01508	0.791399	-3.55506	0.000624524	0.0362247	-0.415315
CPB1	ENSG00000153002	-1.49748	0.101326	-3.55156	0.000631781	0.0364454	-0.423801
ELMO3	ENSG00000102890	-1.14728	4.91245	-3.55102	0.000632898	0.0364454	-0.611158
DNAJA4	ENSG00000140403	-1.11614	4.73193	-3.5407	0.00065479	0.0375703	-0.641516
REEP6	ENSG00000115255	-2.38988	2.74507	-3.53777	0.000661148	0.0376846	-0.603763
ZBTB7C	ENSG00000184828	-1.7973	2.69533	-3.53273	0.000672193	0.0380218	-0.589421
RTN2	ENSG00000125744	-1.31374	3.05514	-3.53121	0.000675547	0.0380765	-0.600328
GLYATL1	ENSG00000166840	-1.77744	0.904646	-3.52059	0.000699526	0.0389492	-0.524193
ERRFI1	ENSG00000116285	1.5441	6.59032	3.52025	0.000700304	0.0389492	-0.694177
PIM1	ENSG00000137193	1.2258	6.38891	3.50859	0.000727576	0.0401577	-0.730813
BIK	ENSG00000100290	-1.7234	3.56056	-3.50619	0.000733317	0.0401964	-0.720711
MCRIP2	ENSG00000172366	-1.03666	3.79487	-3.49795	0.000753346	0.0408729	-0.734808
SCN7A	ENSG00000136546	-1.72467	0.873788	-3.49239	0.000767154	0.0414809	-0.603449
MYPN	ENSG00000138347	-1.61883	0.0887227	-3.4862	0.000782807	0.0415749	-0.610837
RANBP3L	ENSG00000164188	-2.15767	1.48665	-3.48725	0.000780128	0.0415749	-0.654196
HOXA9	ENSG00000078399	-1.92965	2.04746	-3.48451	0.000787138	0.0415749	-0.699352
RTN4RL1	ENSG00000185924	-1.753	2.85387	-3.48819	0.000777754	0.0415749	-0.740426
NR2F1	ENSG00000175745	-2.11957	3.44592	-3.48716	0.000780364	0.0415749	-0.786171
DDC	ENSG00000132437	-2.27247	0.74937	-3.47339	0.000816161	0.0428243	-0.665904
CHAD	ENSG00000136457	-1.78105	0.62152	-3.45973	0.000853197	0.0439011	-0.69297
KCND3	ENSG00000171385	-1.56075	1.91619	-3.45988	0.000852772	0.0439011	-0.738292
CBWD5	ENSG00000147996	-1.01912	3.10414	-3.44648	0.000890635	0.0452437	-0.824956
AACS	ENSG00000081760	-1.12661	3.90895	-3.4442	0.000897219	0.0452812	-0.896641
SEZ6L2	ENSG00000174938	-2.16689	4.19933	-3.44328	0.000899891	0.0452812	-0.928105
TNC	ENSG00000041982	2.31585	6.50924	3.42963	0.000940479	0.0468799	-0.912337
MLIP	ENSG00000146147	-1.24796	0.166255	-3.42535	0.000953544	0.047236	-0.780198
SLC16A12	ENSG00000152779	-1.3097	0.327215	-3.41807	0.000976197	0.0480108	-0.802235
SERPINA11	ENSG00000186910	-1.52151	0.193356	-3.41693	0.000979782	0.0480108	-0.805842
DCST1	ENSG00000163357	-1.16236	0.709975	-3.41215	0.000994949	0.0485334	-0.821877
SLC7A4	ENSG00000099960	-1.49663	0.397501	-3.40634	0.00101373	0.0490632	-0.838543
RGS16	ENSG00000143333	1.59914	5.53243	3.40405	0.00102121	0.0492124	-0.97475
