# Supplementary material for: Scandare: A Successful, Flexible, Prospective, and Longitudinal Biobank Framework
Source: Research Square preprint supplement (doi:10.21203/rs.3.rs-7354298/v1), 2025-08-18
Supplement: Supplementary file 12 [file fb0e785ed956dcbe207432c6.xlsx]

## Sheet: Supplementary Table 8
pathway	pval	padj	log2err	ES	NES	size
HALLMARK_TNFA_SIGNALING_VIA_NFKB	4.23711e-35	2.11855e-33	1.54318	-0.596871	-3.28894	200
HALLMARK_EPITHELIAL_MESENCHYMAL_TRANSITION	4.09041e-32	1.0226e-30	1.47456	-0.574108	-3.14962	199
HALLMARK_E2F_TARGETS	3.87165e-17	6.45275e-16	1.06721	-0.444782	-2.45088	200
HALLMARK_INTERFERON_GAMMA_RESPONSE	3.5136e-14	4.39201e-13	0.965328	-0.407842	-2.23746	199
HALLMARK_G2M_CHECKPOINT	2.41385e-13	2.41385e-12	0.932595	-0.399256	-2.19036	199
HALLMARK_HYPOXIA	1.01065e-12	8.42211e-12	0.91012	-0.393535	-2.23082	193
HALLMARK_OXIDATIVE_PHOSPHORYLATION	1.22881e-11	8.77722e-11	0.875325	0.50798	1.98682	199
HALLMARK_INTERFERON_ALPHA_RESPONSE	1.58098e-10	9.88111e-10	0.826657	-0.479354	-2.40481	97
HALLMARK_INFLAMMATORY_RESPONSE	1.13782e-08	6.32121e-08	0.74774	-0.340349	-1.92758	195
HALLMARK_MITOTIC_SPINDLE	1.29673e-08	6.48363e-08	0.74774	-0.333637	-1.83037	199
HALLMARK_IL6_JAK_STAT3_SIGNALING	2.45642e-06	1.05141e-05	0.627257	-0.423237	-2.01802	79
HALLMARK_ANGIOGENESIS	2.52337e-06	1.05141e-05	0.627257	-0.617348	-2.49329	32
HALLMARK_FATTY_ACID_METABOLISM	3.05358e-06	1.17446e-05	0.627257	0.461595	1.76243	148
HALLMARK_ADIPOGENESIS	4.9628e-06	1.77243e-05	0.610527	0.430211	1.68265	199
HALLMARK_BILE_ACID_METABOLISM	1.23806e-05	4.12688e-05	0.593325	0.492643	1.80641	95
HALLMARK_PROTEIN_SECRETION	6.6813e-05	0.000196509	0.538434	0.473807	1.73734	95
HALLMARK_APOPTOSIS	6.4163e-05	0.000196509	0.538434	-0.284146	-1.53965	160
HALLMARK_ALLOGRAFT_REJECTION	8.99848e-05	0.000241197	0.538434	-0.271906	-1.51693	188
HALLMARK_UV_RESPONSE_DN	9.16547e-05	0.000241197	0.538434	-0.298947	-1.54988	142
